# Supplementary material for: Disorder induced augmentation of the specific capacitance of δ-MnO2 nanoflowers by incorporating Fe3O4 nanodiamonds for supercapacitor electrodes
Source: Royal Society of Chemistry journal article supplement (doi:10.1039/d4ma00880d), 2024-01-01
Supplement: d4ma00880d1.pdf [file d4ma00880d1.pdf]

# Supplementary Information

<sup>1</sup>Md. Raihan Siddiki, <sup>1</sup>Shahid Abubakar Abtahee, <sup>2</sup>Mizanur Rahaman,

<sup>2</sup>Muhammad Rakibul Islam and <sup>1\*</sup>Md. Abdullah Zubair

<sup>1</sup>Department of Nanomaterials and Ceramic Engineering, Bangladesh University of Engineering and Technology (BUET), Dhaka-1000, Bangladesh

<sup>2</sup>Department of Physics, Bangladesh University of Engineering and Technology (BUET), Dhaka-1000, Bangladesh

\* Corresponding author email: [mazubair2017@gmail.com](mailto:mazubair2017@gmail.com) (M. A. Zubair)

## S1. Energy Dispersive X-ray Analysis (EDX)

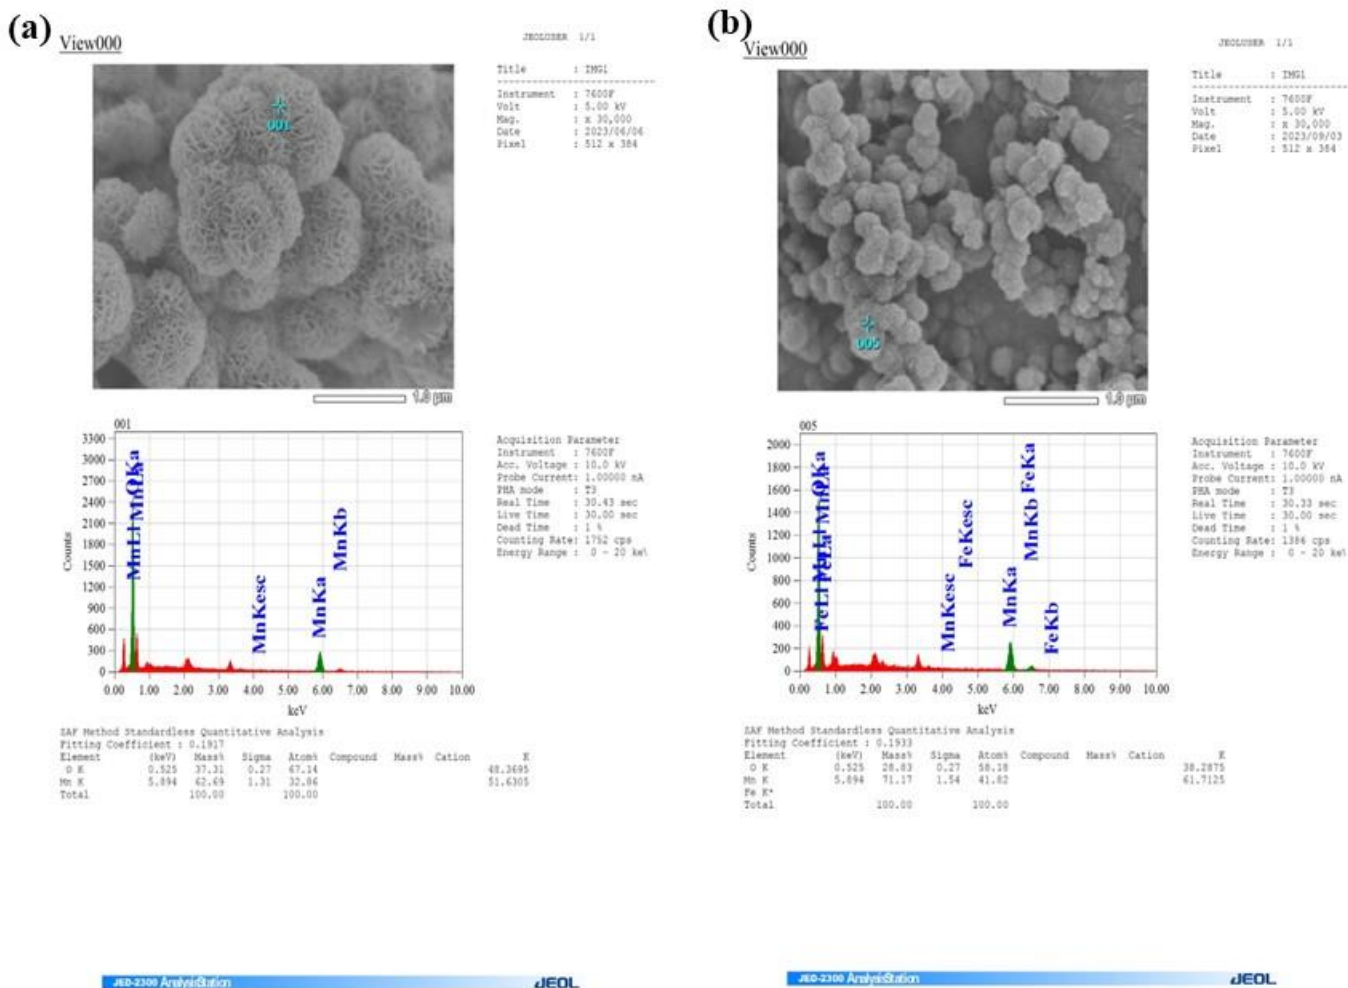

(c)

View000

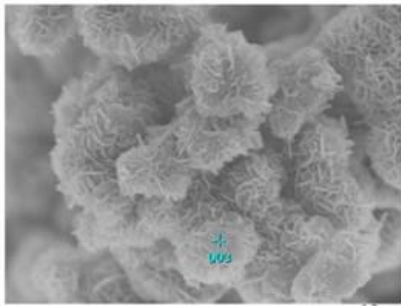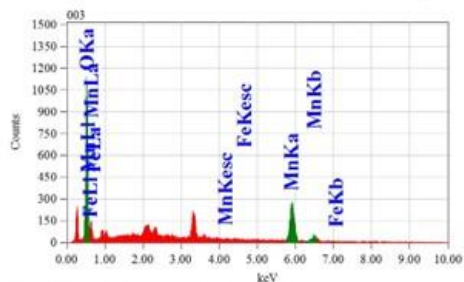

ZAF Method Standardless Quantitative Analysis  
Fitting Coefficient : 0.2913

| Element | (keV) | Mass%  | Sigma | Atom%  | Compound | Mass    | Cation |
|---------|-------|--------|-------|--------|----------|---------|--------|
| O K*    | 0.525 | 21.94  | 0.24  | 49.12  |          | 29.6322 | K      |
| Mn K    | 5.894 | 78.06  | 1.64  | 50.88  |          | 70.3478 | K      |
| Fe K*   |       | 100.00 |       | 100.00 |          |         |        |
| Total   |       |        |       |        |          |         |        |

(d)

View000

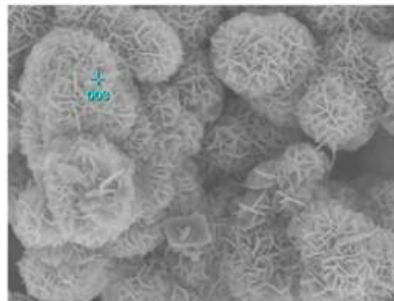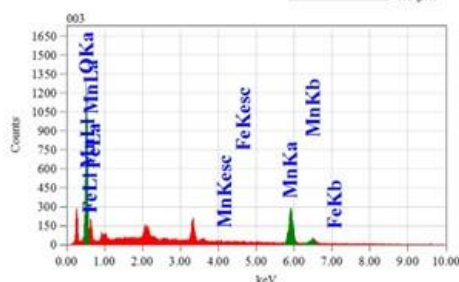

ZAF Method Standardless Quantitative Analysis  
Fitting Coefficient : 0.2949

| Element | (keV) | Mass%  | Sigma | Atom%  | Compound | Mass    | Cation |
|---------|-------|--------|-------|--------|----------|---------|--------|
| O K*    | 0.525 | 22.73  | 0.25  | 51.66  |          | 31.9219 | K      |
| Mn K    | 5.894 | 75.71  | 1.61  | 47.99  |          | 61.5792 | K      |
| Fe K*   | 6.398 | 0.55   | 0.53  | 0.34   |          | 0.4989  | K      |
| Total   |       | 100.00 |       | 100.00 |          |         |        |

JED-2300 AnalysisStation

JEOL

JED-2300 AnalysisStation

JEOL

Figure SF1: Typical EDX spectra of (a) pure  $MnO_2$  (b)  $MnO_2/(1\%) Fe_3O_4$ , (c)  $MnO_2/(3\%) Fe_3O_4$ , (d)  $MnO_2/(5\%) Fe_3O_4$ . Here the figures show only the typical spectra from the EDX point analysis for each sample, where each synthesized nanocomposite was subjected to at least 10 spectral analyses from randomly selected regions of the sample.

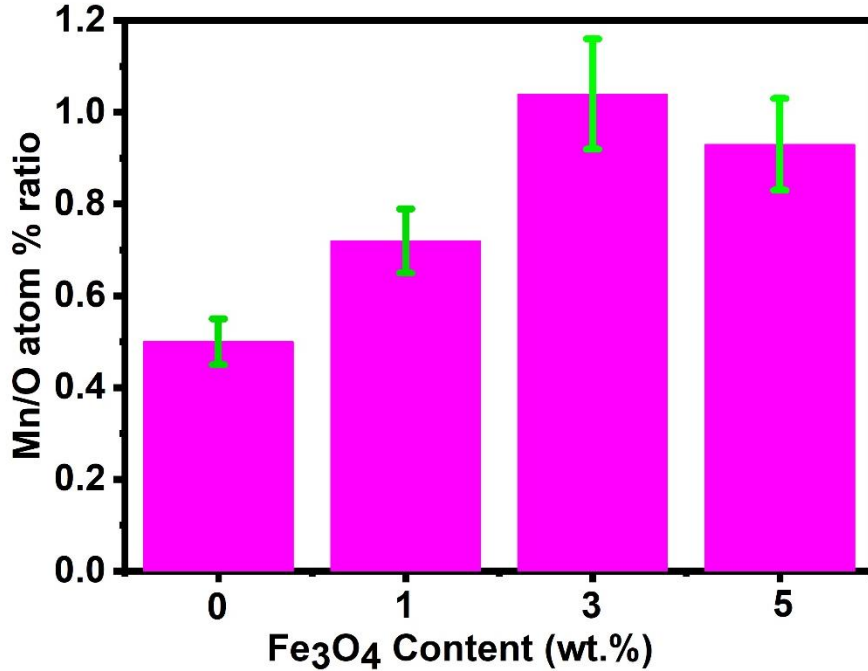

*Figure SF2: Variation of Mn/O atom % ratio with the addition of Fe<sub>3</sub>O<sub>4</sub> nanodiamonds in MnO<sub>2</sub> nanoflower. The atomic ratio of Mn/O is calculated following the semiquantitative Energy Dispersive X-ray (EDX) spectrum as shown in Figure SF1. The ratio is ~ 0.5 in pristine MnO<sub>2</sub>, indicating the stoichiometric proportion of Mn and O in this compound. However, this ratio tends to rise with the addition of Fe<sub>3</sub>O<sub>4</sub> with MnO<sub>2</sub>/ (3%) Fe<sub>3</sub>O<sub>4</sub> nanocomposite exhibiting the highest ratio of ~ 1.04 among all synthesized samples. This indicates that the density of lattice oxygen vacancy defects within the crystal structure increases with the incorporation of Fe<sub>3</sub>O<sub>4</sub> nanodiamond in MnO<sub>2</sub>.*

## S2. Cyclic Stability

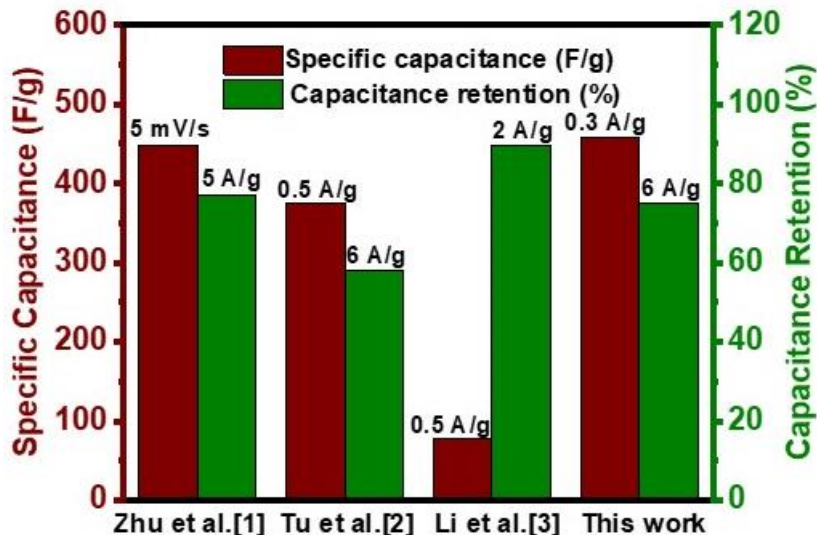

Figure SF3: Comparison between the previously reported  $\text{MnO}_2/\text{Fe}_3\text{O}_4$  based works<sup>1-3</sup> and this work. The  $\delta\text{-MnO}_2/(3\%)\text{Fe}_3\text{O}_4$  nanocomposite exhibited comparable specific capacitance and % of capacitance retention in cyclic stability performance. (Measurement conditions are provided above the bar, and all data reflect the cyclic stability over 4000 cycles)

## References:

- 1J. Zhu, S. Tang, H. Xie, Y. Dai and X. Meng, *ACS Appl. Mater. Interfaces*, 2014, **6**, 17637–17646.
- 2C. Tu, X. Li, C. Lu, Q. Luo, T. Li and M. Zhu, *Mater. Chem. Front.*, 2022, **6**, 1938–1947.
- 3Z. Li, Y. Yao, Y. Zheng, T. Gao, Z. Liu and G. Zhou, *Journal of The Electrochemical Society*, 2018, **165**, E58.
